## THERMOREGULATION AND CONTROL OF HEAD TEMPERATURE IN THE SPHINX MOTH, *MANDUCA SEXTA*

BY JERI R. HEGEL\* AND TIMOTHY M. CASEY†

*Department of Physiology, Cook College, Rutgers University,  
New Brunswick, New Jersey 08903*

(Received 23 October 1981 – Accepted 5 May 1982)

### SUMMARY

Head and thorax temperatures ( $T_h$  and  $T_{th}$ ) were tightly coupled during pre-flight warm-up over a range of ambient temperatures ( $T_a$ ). At  $T_a = 21^\circ\text{C}$ , the head reached a significantly higher temperature ( $T_{th} = 32^\circ\text{C}$ ) than during exogenous heating of dead moths to the same thoracic temperature ( $T_h = 26^\circ\text{C}$ ). In free-flying moths, slopes of linear regressions for both  $T_{th}$  and  $T_h$  versus  $T_a$  were about 0.4. At any  $T_a$ ,  $T_h$  remained only about  $7^\circ\text{C}$  below  $T_{th}$ . Abdominal temperature varied with  $T_a$  with a slope of 1.2 and remained 2–5 degrees above  $T_a$ . Cooling constants ( $\text{min}^{-1}$ ) for the head, calculated from cooling experiments with the thorax either at  $T_a$  or maintained constant at about  $40^\circ\text{C}$ , yielded similar values. During free flight, as  $T_a$  increased from 17 to  $32^\circ\text{C}$ , thoracic heat loss decreased from 36 to 20% of the total heat production, head heat loss decreased from 27 to 8%, and abdominal heat loss increased from 17 to 37%. During warm-up at all  $T_a$ 's the largest component of energy expenditure was the heat storage and heat loss that occurred from the thorax, followed by that from the abdomen and then by that from the head. Exogenous heating of some live moths resulted in cyclic temperature fluctuations in which  $T_h$  and  $T_{th}$  changed simultaneously and in opposite directions. During each cycle, the heart beat pattern changed, becoming irregular when  $T_{th}$  was increasing and returning to a regular pattern when  $T_{th}$  was decreasing. Smaller temperature fluctuations in the head occurred at the same rate as the heart beat. These data suggest that the head temperatures observed during pre-flight warm-up and flight are the result of active heat transfer from the thorax via the blood circulation.

### INTRODUCTION

Studies of the physiological regulation of body temperature in moths have dealt primarily with regulation of thoracic temperature. Heat is produced in the thorax as a result of mechanical inefficiency of flight muscle contraction (Heinrich, 1974). In *Manduca sexta*, as in other moths, this heat is either stored in the thorax to increase

\* Present address: CMDNJ, Rutgers Medical School, Piscataway, NJ.

† Present address: Department of Entomology, Cook College, Rutgers University, New Brunswick, NJ 08903, to whom reprint requests should be addressed.

thoracic temperature ( $T_{th}$ ) as in pre-flight warm-up (Heinrich & Bartholomew, 1971) or some of it is actively transferred to the abdomen to maintain thoracic temperature during flight (Heinrich, 1971*b*). This regulation is brought about by changes in blood circulation pattern between the thorax and abdomen (Heinrich, 1970, 1971*b*).

In most of these experiments, head temperature ( $T_h$ ) was not measured along with thorax and abdomen temperatures. Because of the close proximity of the head and thorax, and because the dorsal vessel empties into the head after the blood has passed through the thorax, there may be some active transfer of thoracic heat to the head. The effect of this heat on the head temperature is of particular interest, since the neural control centres are located in the head, and nervous output that controls the contraction of flight muscles is highly dependent on temperature (Kammer, 1968).

In the present study, we investigate head temperature of *M. sexta* during pre-flight warm-up and free-flight over a range of  $T_a$ 's. We also quantify rates of heat loss from the head, and examine the mechanism of heat transfer between thorax and head in an attempt to evaluate their significance for thermoregulation.

#### MATERIALS AND METHODS

Pupae of *M. sexta* were purchased from Carolina Biological Supply Co. and were kept in saturated conditions in an emergence chamber. All experiments were conducted within the first three days after emergence.

Head temperatures for heating and cooling experiments were measured by inserting a 44 gauge copper-constantan thermocouple in the centre of the dorsal surface of the head. Thorax temperatures were measured by inserting a 36 gauge thermocouple into the ventro-lateral thorax. The cuticle was punctured with a microsurgical needle. Temperatures were read on two Bailey Bat-4 laboratory thermometers. Head and thorax temperatures were continuously recorded by connecting the output of the thermometers to two servo channels of a Gilson polygraph (150 mm full scale).

Cooling rates of the heads of dead moths (killed by quick freezing in a  $-80^\circ\text{C}$  freezer) were measured in two ways. First, with the moth on a styrofoam pad and the thorax and abdomen shielded with aluminium foil, the head was heated to about  $40^\circ\text{C}$  with a microscope lamp. The lamp was then switched off and  $T_h$  was continuously measured during cooling ( $T_a = 22^\circ\text{C}$ ). Alternatively, the head and thorax were heated with two lamps and, while the thorax was maintained at about  $40^\circ\text{C}$ , the head was allowed to cool.

Moths to be used for live external heating experiments were precooled to  $4^\circ\text{C}$  in a refrigerator. Moths were then secured to a styrofoam pad with crossed insect pins between head and thorax and between thorax and abdomen. Thermocouples were inserted into the head and thorax and the wings were cut off (this caused no visible loss of blood). To measure thoracic heart pulsations, two 44 gauge constantan electrodes were inserted into holes on either side of the dorsal midline. The electrodes were attached to an impedance converter which was connected to the polygraph. All of these preparations could be completed before the moths reached a temperature where they became active. With the head and abdomen shielded with aluminium foil, the thorax was heated using a microscope lamp.

After completing experiments on live moths, some were killed by injecting 0.02–0.05 c.c. of ethyl acetate into the abdomen. The heating was then repeated on the dead moths, with all thermocouples and body positions exactly the same as in experiments using live moths.

During warm-up,  $T_h$  and  $T_{th}$  were measured with a temperature probe consisting of a 44 gauge thermocouple threaded into a 1  $\mu$ l glass capillary tube that had been drawn out to a point in a flame. The end of the thermocouple was secured to the tip of the glass tube with a drop of quick drying liquid glue. The capillary tube with the thermocouple was inserted into a microburet. This arrangement minimized conduction of heat from the finger tips to the probe.

Gentle pinching of the antennae caused the moths to initiate pre-flight warm-up. At various times during warm-up, the moths were seized by the forewings and inverted. To measure  $T_h$ , the probe was thrust into the underside of the head (see Casey, Hegel & Buser, 1981 for more details). The  $T_{th}$  was measured immediately afterwards by inserting the probe into the centre of the thorax from the ventral side. These measurements took approximately 3 s.

During flight at different  $T_a$ 's,  $T_h$ ,  $T_{th}$  and  $T_{ab}$  were measured to the nearest 0.2 °C, using a temperature probe consisting of a 36 gauge thermocouple inserted into a 24 gauge hypodermic needle. The moths were induced to fly by gentle prodding and were seized after at least one minute of continuous free flight in a temperature controlled room. Head and thorax temperatures were measured as in the warm-up experiments. Abdominal temperatures were measured by inserting the probe through one of the intersegmental membranes on the ventral surface of the abdomen. All temperatures were measured within 5–6 s.

## RESULTS

**Head temperature.** When dead moths ( $n = 8$ ) were heated exogenously on the thorax to  $40.0 \pm 2.5$  °C ( $T_a = 22$  °C), the  $T_h$  stabilized at  $26.1 \pm 1.7$  °C. A sample heating curve is shown in Fig. 1. This temperature reached by the head is its equilibrium temperature ( $T_{h(eq)}$ ) and is the result of passive heat transfer from the thorax to the head.

During pre-flight warm-up, the  $T_h$  was a linear function of  $T_{th}$  (Fig. 2). Actual head temperatures at any given  $T_{th}$  were greater at high  $T_a$  than at low  $T_a$ . Slopes of linear regressions for  $T_h$  v.  $T_{th}$  (Fig. 2) increased with increasing  $T_a$  (0.67 at  $T_a = 16$ , 0.78 at  $T_a = 21$ , and 0.97 at  $T_a = 30$  °C).

The time course of head temperature during warm-up was derived from data in Fig. 2, assuming an appropriate rate of increase in  $T_{th}$  at different  $T_a$ 's (Heinrich & Bartholomew, 1971). At all  $T_a$ 's, head temperature increased linearly with time during most of the warm-up period (Fig. 3). However, at the beginning of warm-up, the rate of increase of head temperature was initially slow and increased progressively. The rate of warm-up of the head increased directly with  $T_a$  (Fig. 3).

Comparison of Figs 1 and 3 shows that at the same  $T_a$ ,  $T_h$  in live moths during warm-up was greater than  $T_h$  in dead moths heated to a similar  $T_{th}$ . When the thorax reached 40 °C, the head temperature during warm-up averaged 32 °C, while the  $T_h$

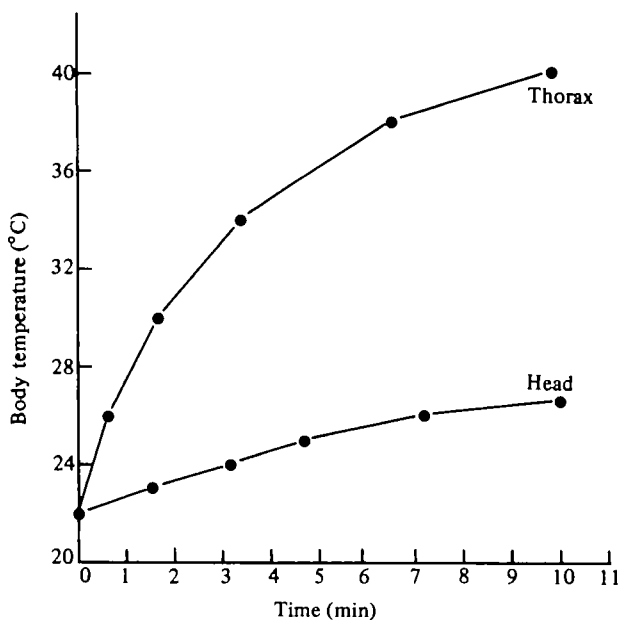

Fig. 1. An example of the relation of head and thorax temperatures with time during exogenous heating of the thorax of a dead moth ( $T_a = 22^\circ\text{C}$ ).

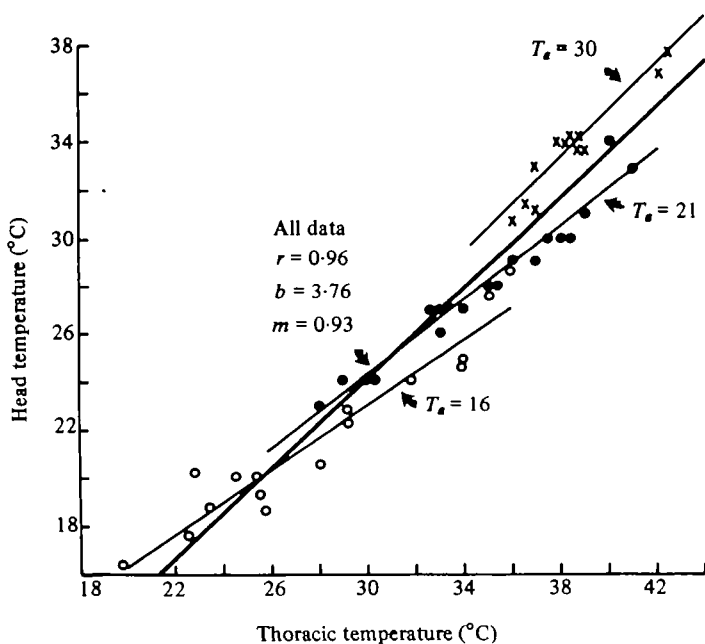

Fig. 2. Head temperature in relation to thoracic temperature during pre-flight warm-up at  $T_a = 16^\circ\text{C}$  (○),  $T_a = 21^\circ\text{C}$  (●), and  $T_a = 30^\circ\text{C}$  (×).

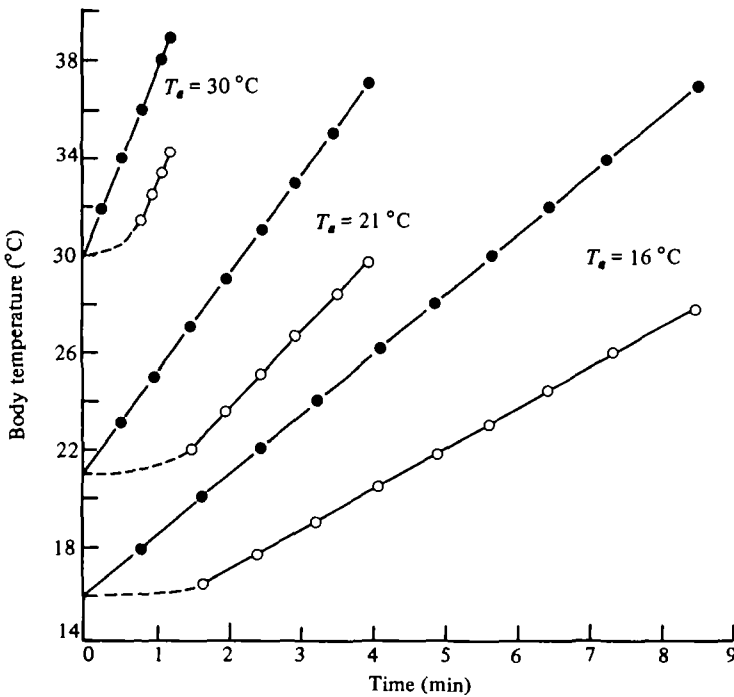

Fig. 3. Time course of temperature increase of thorax (●) and head (○) during warm-up at  $T_a = 16, 21$ , and  $30^\circ\text{C}$ ; calculated from thorax and head temperature data in Fig. 2 and warm-up rates in Table 1.

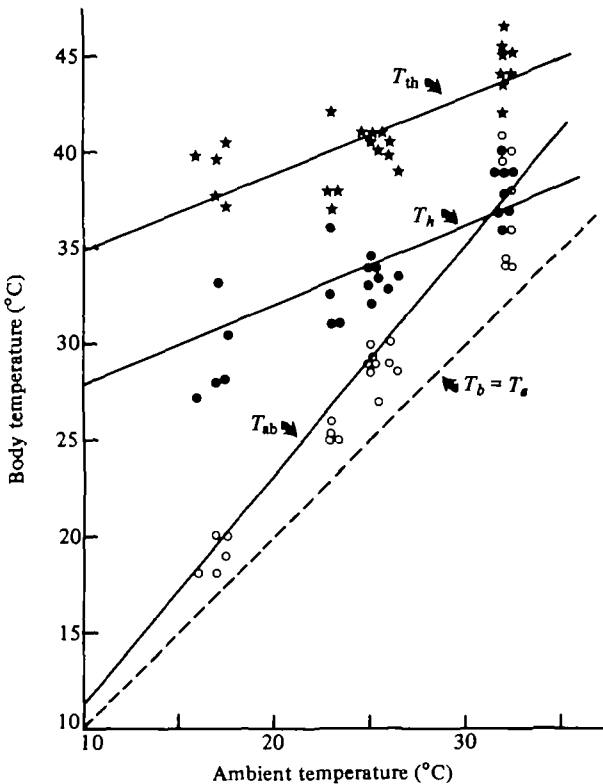

Fig. 4. Thoracic (★), head (●), and abdominal (○) temperatures during free flight plotted against ambient temperature ( $n = 26$ ). The dotted line shows the relation when  $T_b = T_a$ . Least-square regression equations describing these relations are:  $T_{th} = 0.40 T_a + 30.9$  ( $r = 0.81$ );  $T_h = 0.42 T_a + 23.8$  ( $r = 0.79$ );  $T_{ab} = 1.20 T_a - 0.33$  ( $r = 0.92$ ).

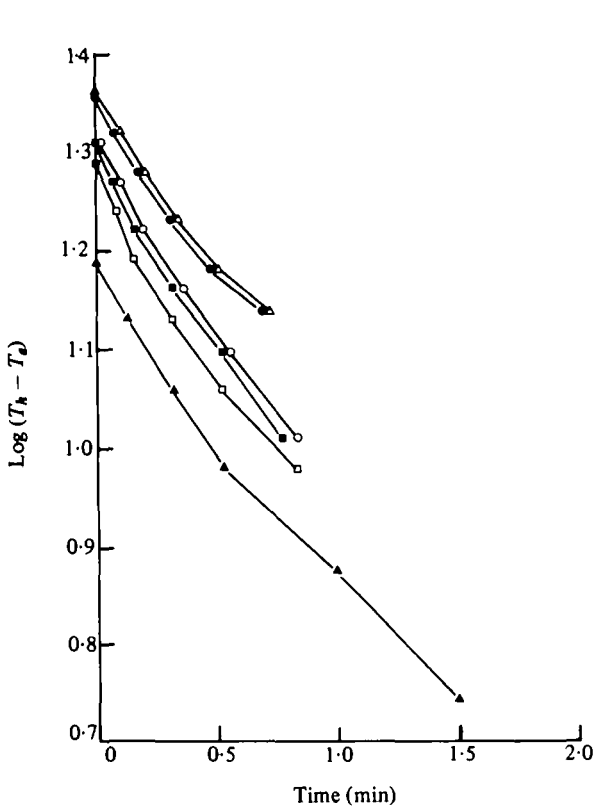

Fig. 5. Cooling rates of the heads of dead moths with the thorax at ambient temperature. Symbols used to differentiate between separate runs.

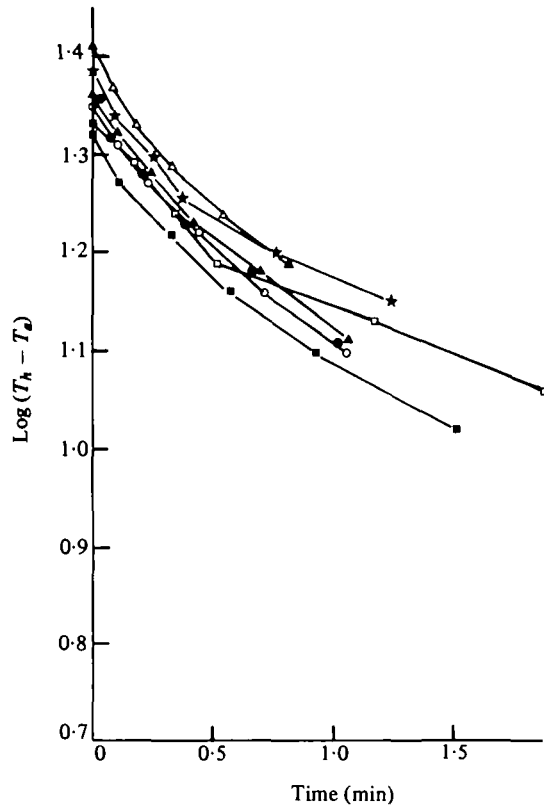

Fig. 6. Cooling rates of the heads of dead moths with the thorax maintained at approximately 40 °C and the driving force calculated as  $T_{\text{head}} - T_a$ . Symbols as in Fig. 5.

during exogenous heating only reached 26 °C. This indicates that less than half of the heat transfer from the thorax to the head during warm-up can be accounted for by passive heating.

During free flight, regulation of thoracic temperature was apparent over a range of  $T_a$ 's (Fig. 4).  $T_{th}$  varies from 38 to 44 °C at  $T_a$ 's from 17 to 32 °C. There was little change in  $T_{th}$  between  $T_a$ 's of 17–26. However, between  $T_a$ 's of 26–32, mean  $T_{th}$  increased by 4–5 °C (Fig. 4).

The abdominal temperature was directly related to  $T_a$  (Fig. 4). The difference between  $T_{ab}$  and  $T_a$  increased from about 2 to 5 °C as  $T_a$  varied from 17 to 32 °C. The increase in  $(T_{ab} - T_a)$  at high  $T_a$  is consistent with the findings of Heinrich (1971*b*) that heat is actively transferred to the abdomen at high  $T_a$ .

The slope of head temperature in relation to  $T_a$  was essentially the same as that exhibited by the thorax and substantially different from that of the abdomen (Fig. 4). The difference between  $T_h$  and  $T_a$  decreased with increasing  $T_a$ , which suggests that the head temperature is regulated during flight.

**Head cooling.** Cooling constants ( $k$ ) of the head were calculated from  $T_h$  v. time data from cooling experiments, with  $T_{th}$  both at the same value as  $T_a$  and maintained

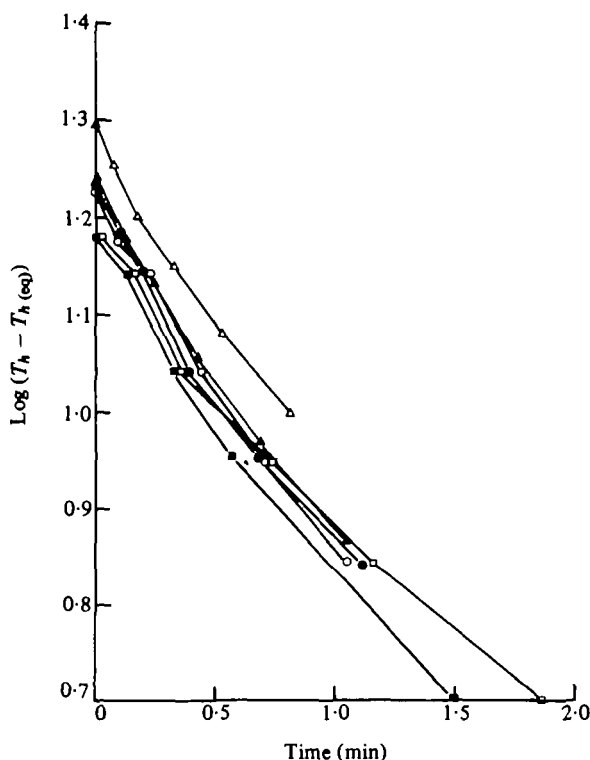

Fig. 7. Cooling rates of the head from the same experiments as Fig. 5, but with the driving force calculated as  $T_h - T_{h(eq)}$ .

constant at about  $40^\circ\text{C}$ . The cooling constant ( $k$ ) represents 2.303 times the slope of the semi-log plot of  $T_h - T_a$  v. time.

The mean cooling constant for the head with the thorax at ambient temperature (method 1) was  $0.789 \text{ min}^{-1} \pm 0.058 \text{ S.D.}$  ( $n = 6$ ). Although a slight curvilinearity is apparent, linear regressions of  $\log (T_h - T_a)$  v. time for individual runs had correlation coefficients of at least 0.99 (Fig. 5), indicating passive cooling.

Cooling constants for the head obtained from cooling curves in which the thorax was maintained at about  $40^\circ\text{C}$  (Fig. 6) were  $0.482 \text{ min}^{-1} \pm 0.092$  ( $n = 6$ ) and the relations of  $(T_h - T_a)$  versus time were more curvilinear than those obtained using method 1 (Fig. 5). Although the situation with the thorax at  $40^\circ\text{C}$  rather than at  $T_a$  more closely represents flight conditions, the driving force for heat loss from the head is  $(T_h - T_{h(eq)})$  not  $(T_h - T_a)$ , because heat is constantly being passively transferred to the head (see Bakken, 1976). Using  $T_{h(eq)}$  from separate experiments (Fig. 1), semi-log plots of  $\log (T_h - T_{h(eq)})$  versus time (Fig. 7) yield straight lines ( $r > 0.99$ ). Mean cooling constants were  $0.76 \text{ min}^{-1} \pm 0.096$  ( $n = 6$ ), similar to those obtained from method 1.

The calculated cooling constants can be used with more confidence since similar values were derived from two different methods. Therefore, the head conductance ( $C_h$  in  $\text{mW/g } ^\circ\text{C}$ ) calculated from the mean of these cooling constants ( $k$  times the specific heat) is an accurate estimate of the actual conductance (see Table 1).

Table 1. *Data used to calculate heat exchange from various avenues (Figs. 8, 9, Table 2) during pre-flight warm-up and free flight in 2.2 g M. sexta*

(Conductance data are given for warm-up and free flight, since the former occurs essentially in still air while the latter occurs in moving air at least equivalent to the induced velocity.)

|                                         | Source |                                                      |                              |
|-----------------------------------------|--------|------------------------------------------------------|------------------------------|
| Energy metabolism (flight) (mW)         | 424    | Heinrich, 1971 <i>a</i> ; Casey, 1976 <i>b</i>       |                              |
| Heat production (flight) (mW)           | 339    | Assuming 80 % of metabolism                          |                              |
| Head conductance (warm-up) (mW/g °C)    | 44.0   | Present study                                        |                              |
| Thorax conductance (warm-up) (mW/g °C)  | 6.8    | Heinrich, 1971 <i>a</i> ; Bartholomew & Epting, 1975 |                              |
| Abdomen conductance (warm-up) (mW/g °C) | 10.7   | Casey, 1976 <i>a</i>                                 |                              |
| Head conductance (flight)* (mW/g °C)    | 66.1   | Present study                                        |                              |
| Thorax conductance (flight)* (mW/g °C)  | 10.3   | Bartholomew & Epting, 1975                           |                              |
| Abdomen conductance (flight) (mW/g °C)  | 16.2   | Casey, 1976 <i>a</i>                                 |                              |
| Mass (g)                                |        |                                                      |                              |
| head                                    | 0.10   | Present study                                        |                              |
| thorax                                  | 0.57   | Present study                                        |                              |
| abdomen                                 | 1.40   | Present study                                        |                              |
|                                         | $T_a$  |                                                      |                              |
|                                         | 16     | 21                                                   | 30                           |
| Rate of warm-up (°C/min)                | 2.44   | 4.1                                                  | 7.6                          |
|                                         |        |                                                      | Heinrich & Bartholomew, 1971 |
| Relative humidity (%)                   | 80     | 44                                                   | 32                           |
|                                         |        |                                                      | Present study                |
| $T_{th} - T_a$ (flight) (°C)            | 20.7   | 16.0                                                 | 11.7                         |
|                                         |        |                                                      | Present study (fig. 5)       |
| $T_h - T_a$ (flight) (°C)               | 13.8   | 9.2                                                  | 4.1                          |
|                                         |        |                                                      | Present study                |
| $T_{ab} - T_a$ (flight) (°C)            | 2.6    | 4.1                                                  | 5.5                          |
|                                         |        |                                                      | Present study                |
| Heat storage (thorax)† (mW)             | 80     | 178                                                  | 274                          |
|                                         |        |                                                      | Heinrich & Bartholomew, 1971 |
| Heat storage (head)† (mW)               | 8      | 12.6                                                 | 18.5                         |
|                                         |        |                                                      | Present study                |

† Rate of warm-up  $\times$  mass  $\times$  specific heat (3.43 J/g °C).

\* Assuming 50 % increase over still air value (see Heinrich, 1971; Casey, 1976*a*, 1980).

**Heat exchange.** In a free-flying *M. sexta*, heat is lost at different rates from a variety of sites on the body. Therefore, a heat budget is useful for estimating the relative importance of these various avenues of heat loss. Heat losses from head, thorax, and abdomen and via respiratory evaporation during free flight over a range of  $T_a$ 's are given in Fig. 8. Head, thorax and abdominal heat losses were calculated by multiplying the conductance of the specific body part by its mass and its temperature excess over ambient (Table 1). Heat loss due to respiratory evaporation was calculated at the temperature and pressure of the working thorax (Weis Fogh, 1967; Casey, 1976*b*).

Heat loss from the head is a very significant component of the total heat production at low  $T_a$  (Fig. 8); more than  $1\frac{1}{2}$  times either evaporative or abdominal heat loss. However, as  $T_a$  increases, the contribution of the head to the total heat loss decreases to less than one half the evaporative heat loss and less than one fourth the abdominal heat loss. Since heat loss from both the head and the thorax shows a similar relation to  $T_a$  (Fig. 8), it is apparent that the head does not operate as a thermal window in flight for stabilizing  $T_{th}$ .



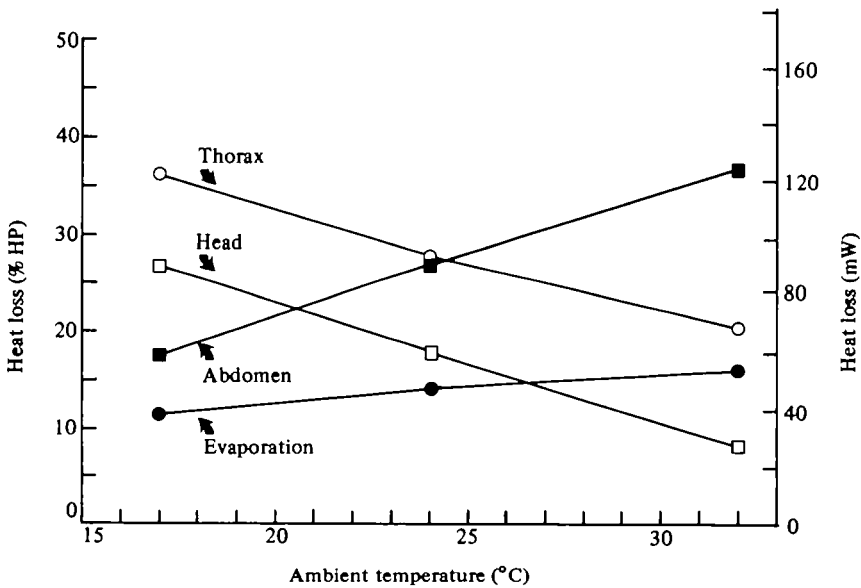

Fig. 8. Calculated rates of heat loss of the thorax, head, abdomen, and respiratory evaporation in mW and % total heat production (Table 1) during free flight at  $T_a$ 's of 17, 24, and 32 °C.

In contrast, although the temperature of the abdomen is only slightly elevated above  $T_a$  (Fig. 4), due to its large mass, total heat loss from the abdomen accounts for about 17–37 % of the total heat production proceeding from low to high  $T_a$ . At most  $T_a$ 's, heat loss from the abdomen exceeds that from the head (fig. 8) and at high  $T_a$  it also exceeds thoracic heat loss.

The thermal constraints during warm-up are fundamentally different than those present during flight. For example, it is well known that sphinx moths warm their thorax as rapidly as possible (Heinrich & Bartholomew, 1971; Heinrich & Casey, 1973) and that  $T_{ab}$  increases only about 1 °C above  $T_a$ . For the purposes of calculation, we assume a 1 °C increase in  $T_{ab}$ , regardless of  $T_a$  (see Heinrich & Bartholomew, 1971). We also assume that evaporation during warm-up is 10 % of the total heat production calculated from other sources and is independent of  $T_a$ . This is probably a conservative estimate, since rates of evaporative heat loss during flight range from 12 to 16 % of the total heat loss (Fig. 8).

Rates of heat storage (see Table 1) and heat loss (calculated as above for flight data) during warm-up at  $T_a = 21$  °C are given in Fig. 9. Heat storage in the thorax at this  $T_a$  amounted to 54 % of the total heat production (Table 2), slightly less than predicted from the regression of Bartholomew, Vleck & Vleck (1981). The heat stored in the head, calculated by assuming a linear increase of  $T_h$  with time (Fig. 3), was only about 10 % of the heat stored in the thorax (Table 2). Although rates of warm-up are generally similar for head and thorax (see Fig. 3) the mass of the head is substantially less, which reduces the total input of heat needed to increase  $T_h$ . Heat storage in the abdomen is generally considered to be negligible during warm-up in insects (Heinrich & Bartholomew, 1971; Heinrich, 1975; May, 1976; Casey *et al.* 1981). However,

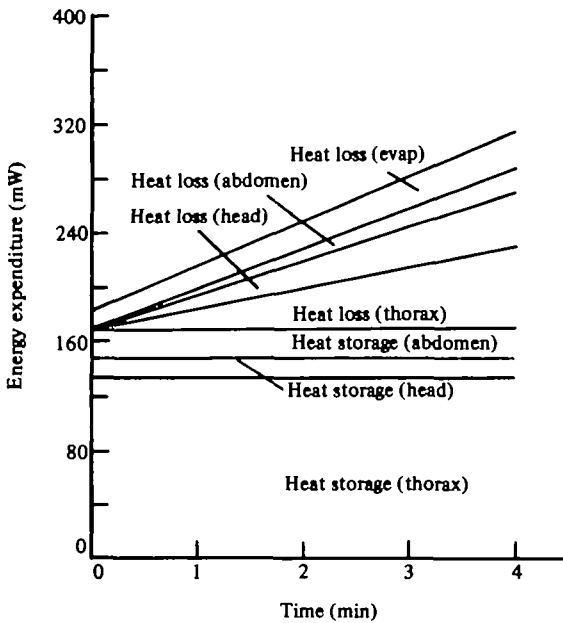

Fig. 9. Calculated rates of heat storage and heat loss of the thorax, head, abdomen, and due to respiratory evaporation plotted against time during pre-flight warm-up at  $T_a = 21\text{ }^{\circ}\text{C}$ .

Table 2. *Components of total energy expenditure for a 2.2 g M. sexta during pre-flight warm-up at several  $T_a$ 's*

(Instantaneous rates of energy expenditure (Fig. 9) are integrated over the entire duration of warm-up.)

| Heat production (J)  | $16\text{ }^{\circ}\text{C}$ | $21\text{ }^{\circ}\text{C}$ | $30\text{ }^{\circ}\text{C}$ |
|----------------------|------------------------------|------------------------------|------------------------------|
| Thorax-storage loss  | 40.93 (42.6)                 | 32.28 (53.7)                 | 17.36 (59.9)                 |
| Thorax loss          | 20.75 (21.6)                 | 7.68 (12.8)                  | 1.20 (4.1)                   |
| Head-storage loss    | 3.97 (4.1)                   | 3.18 (5.3)                   | 1.71 (5.9)                   |
| Head loss            | 13.04 (13.6)                 | 4.90 (8.1)                   | 0.76 (2.6)                   |
| Abdomen-storage loss | 4.78 (5.0)                   | 4.80 (8.0)                   | 4.80 (16.6)                  |
| Abdomen loss         | 3.82 (4.0)                   | 1.80 (3.0)                   | 0.52 (1.8)                   |
| Evaporative loss     | 8.73 (9.1)                   | 5.48 (9.1)                   | 2.64 (9.1)                   |
| Total cost           | 96.02 (100)                  | 60.12 (100)                  | 28.99 (100)                  |

our calculations indicate that in *M. sexta*, abdominal heat storage during warm-up ranges from 5 to 15 % of the total heat production (Table 2). Heat loss during warm-up is greatest in the thorax, followed by the head and abdomen respectively (Fig. 9).

As shown in Table 2, the total cost of warm-up is inversely related to ambient temperature, even though rates of heat production for a given  $T_{th}$  should be the same, regardless of  $T_a$  (Heinrich & Bartholomew, 1971; Casey *et al.* 1981). This is reasonable, since duration of warm-up is also inversely related to  $T_a$  (Table 1), and total cost of warm-up is calculated as the area under the energy expenditure *v.* time plot.

*Temperature fluctuations.* External heating of the thorax in live moths led to two different sets of results. For some moths, while  $T_{th}$  rose, the head temperature did

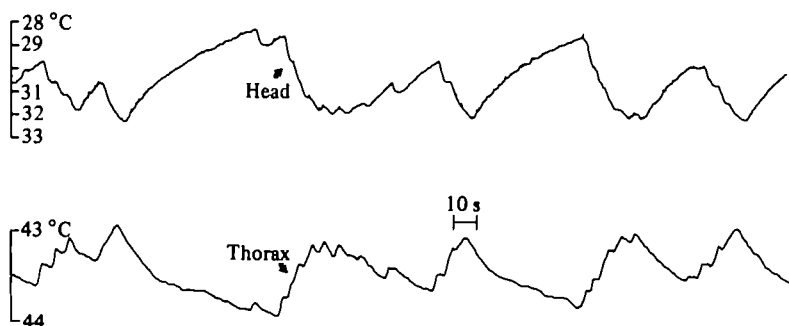

Fig. 10. Sample record from an exogenous heating experiment on a live moth showing head and thorax temperature fluctuations. Downward deflection = increased temperature. Temperature fluctuations of head and thorax  $\approx 2^{\circ}\text{C}$  (see Fig. 12).

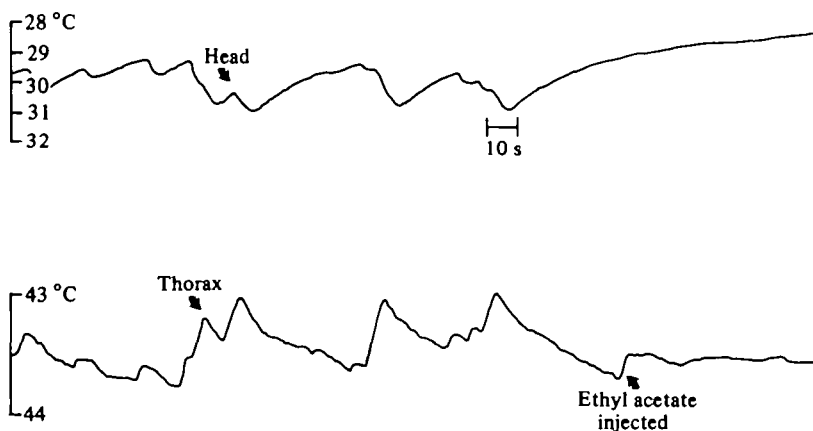

Fig. 11. Sample record of head and thorax temperatures of a moth killed with 0.05 c.c. injection of ethyl acetate during an exogenous heating experiment. Downward deflection = increase in temperature.

not rise much above what can be accounted for by passive heating. When  $T_{th}$  reached  $40^{\circ}\text{C}$ , the head usually stayed below  $27^{\circ}\text{C}$ . However, as the thorax in some moths was heated, the head temperature rose significantly higher (to about  $31^{\circ}\text{C}$ ), and as  $T_{th}$  approached  $40^{\circ}\text{C}$ , cyclic temperature fluctuations were recorded in both head and thorax. The changes in  $T_h$  and  $T_{th}$  occurred simultaneously and in opposite directions (Fig. 10). As thorax temperature decreased slightly,  $T_h$  increased slightly. Then  $T_{th}$  would rise again by the same amount and the  $T_h$  would correspondingly decrease by the same amount. This cyclic pattern was recorded for over 15 min. Injection of 0.05 c.c. ethyl acetate into the abdomen between the intersegmental membranes caused this pattern to cease. The head then cooled rapidly to the equilibrium temperature and the thorax stabilized at a temperature higher than the temperature reached during the cycling pattern (Fig. 11).

In one experiment, the pulsations of the thoracic heart were recorded simultaneously with head and thorax temperatures. Heart rate at the beginning of the run was at a regular pace of about 32 beats/min. Immediately prior to the onset of the cyclic

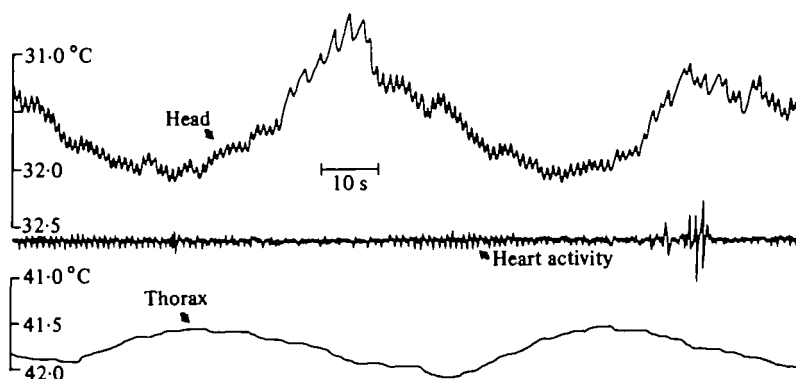

Fig. 12. Sample record from an exogenous heating experiment on a live moth illustrating head and thorax temperature fluctuations and corresponding heart activity. Downward deflection = increase in temperature.

temperature fluctuations, the heart rate pattern changed. As  $T_{th}$  increased and  $T_h$  decreased in the first half of the cycle, the heart rate became irregular. Just before the other half of the cycle began, the heart rate returned to a regular pattern of about 30 beats/min, which continued as the  $T_{th}$  decreased and  $T_h$  increased. The heart beat then became irregular again and the cycle repeated. This change in heart rate pattern continued during every cycle (Fig. 12).

As well as these temperature fluctuations, the trace also showed smaller temperature fluctuations in the head (less than  $0.1^\circ\text{C}$ ) that exactly corresponded to heart rate (Fig. 12). When the heart rate became irregular during each cycle, these temperature fluctuations also became irregular.

#### DISCUSSION

*Head temperature during warm-up.* The conductance of the head is five times that of the thorax (Table 1), yet  $T_h$  is closely coupled to  $T_{th}$  during warm-up (Fig. 3). There must be large amounts of heat entering the head to compensate for this heat loss. Heat comes primarily from transfer to the head of heat produced by the active flight muscles in the thorax. Since passive transfer only accounts for about 45% of the heat in the head, some physiological transfer must also be present. This transfer could occur via blood in the dorsal vessel which empties into the head after passing through the thorax.

As the head temperature increases with  $T_{th}$ , the driving force for heat loss from the head also increases. For  $T_h$  to keep increasing throughout warm-up, the amount of heat transferred must also increase continuously. The pulsation frequency of the aorta in the thorax is directly related to  $T_{th}$  during warm-up in the tent caterpillar moth, *Malacosoma americana* (Casey *et al.* 1981). If pulsation frequency in *M. sexta* shows a similar relationship to  $T_{th}$ , the increase in pulsation would provide the added heat that would compensate for the greater heat loss and allow the head temperature to stay coupled with  $T_{th}$ .

In warm-up, it should be advantageous to retain heat in the thorax and increase

th as rapidly as possible (see Bartholomew & Heinrich, 1973). It seems counter-productive, then, to transfer heat into the head during warm-up because that would slow the rate of warm-up of the thorax. However, such a pattern is explicable if the moth is attempting to achieve some minimal head temperature prior to take-off. Since the contraction of the flight muscles is controlled by nervous impulses and this neural output depends on temperature (Kammer, 1968), it may be necessary to keep the neural control centres in the head warm in order for effective flight to occur. Since warm-up is a preparation for flight, active transfer of heat to the head during warm-up suggests that the head temperature may be regulated during flight.

**Head temperature during flight.** The only other data available on the head temperature of insects during flight are from a study on honeybees (Heinrich, 1980*a, b*). At high  $T_a$ , honeybees transferred heat from the thorax to the head via blood circulation. Then, most of this heat was lost from the head due to evaporation. This serves as a mechanism to prevent the thorax from overheating during flight at high  $T_a$ . Honeybees are unable to use the abdomen as a site of controlled heat loss, due to a specialized counter current exchanger at the junction of the thorax and abdomen (Heinrich, 1980*b*). Unlike honeybees, *M. sexta* uses the abdomen as a thermal window during flight (Heinrich, 1971*b*). The abdomen is well suited as an area for heat loss from the thorax, because small changes in abdominal temperature result in significant changes in heat loss (Figs. 4, 8). Therefore, the moths may not need to rely on the head as a thermal window.

Head temperature data during flight also suggest that the head is not used as a thermal window. If the head operated as a thermal window,  $(T_h - T_a)$  should increase with increasing  $T_a$  as occurs in the abdomen (Fig. 4), in order to counteract the reduction in passive heat loss from the thorax. However, like  $(T_{th} - T_a)$ , the temperature difference for the head decreases with increasing  $T_a$  (Fig. 4). These data indicate that the head temperature is regulated. This interpretation is consistent with the observation that large quantities of heat are transferred to the head during warm-up.

**Heat exchange.** Although the heat budgets (Figs. 8, 9; Table 2) derived for warm-up and flight are crude, they provide a quantitative first approximation of the significance of the head in the thermal balance of moths during warm-up and free flight. As shown in Fig. 8, the major portion of energy expended during warm-up results in thoracic heat storage. Since the function of warm-up is to elevate the flight muscles above a minimum flight temperature, the larger the proportion of heat allocated to heat storage, the more rapidly the moth will warm. Because of high head conductance (Table 1), heat loss and storage of the head account for a small, although significant, portion of total heat production. As  $T_a$  declines, heat loss from the head increases, due to larger differences between  $T_h$  and  $T_a$  (Fig. 2). Since about half of the heat transfer between the thorax and head is active (compare Figs. 1, 3), and can be abolished (Figs. 10, 11), it appears that the benefits of elevating head temperature outweigh the energetic costs involved.

Abdominal heat storage and loss are of similar magnitude to that of the head, but they may be overestimated because we assume an average abdominal temperature increase of 1 °C during warm-up (Heinrich & Bartholomew, 1971 their Fig. 10). Data are not available for the temperatures of different locations in the abdomen of sphinx

moths during warm-up. If, as in dragonflies, there can be large differences in temperature between different sites in the abdomen (Heinrich & Casey, 1978), a single measurement of abdominal temperature may not provide sufficient information for calculating heat storage or loss.

The cost of maintaining a regulated head temperature during flight is energetically expensive at low  $T_a$ 's, with heat loss from the head accounting for about 25 % of all heat loss at  $T_a = 17^\circ\text{C}$  (Fig. 8). At  $T_a = 32^\circ\text{C}$ , however, less than 10 % of all heat loss occurs from the head. As a consequence of quantifying heat exchange from the head, our heat budget is a better representation of the fate of energy in a flying moth than a previous budget derived for the sphinx moth, *Hyles lineata* (Casey, 1976a). Our calculations account for 92, 87 and 81 % of the total heat production during flight at  $T_a$ 's of 17, 24, and  $32^\circ\text{C}$ , while the previous budget could only account for 69, 64, and 63 % of total heat production for a 1.5 g *H. lineata* flying at similar  $T_a$ 's. It is significant that in neither of these budgets does heat production equal heat loss at the highest  $T_a$ 's. Either one of the avenues of heat exchange is underestimated by our approach or an additional site of regulation (see below) has not been examined (see Casey, 1976b).

**Mechanism of heat transfer.** When the thorax of a live moth is heated to  $40^\circ\text{C}$  or more, the cyclic fluctuations of the head and thorax temperature begin (Fig. 10). There is no evidence of this cycling at lower  $T_{th}$ . Since the heat input by the lamp is constant, when  $T_{th}$  decreases and this is followed immediately by an increase in  $T_h$ , it is obvious that active heat transfer is involved. Conversely, when  $T_{th}$  increases and  $T_h$  decreases, this heat transfer mechanism must have been deactivated. The mechanism whereby heat transfer can be controlled is via blood circulation. As shown in Fig. 12, not only are temperature fluctuations of the head exactly coupled with heart beats, but the overall activity of the heart correlates with observed temperature cycles.

The larger temperature fluctuations resulting from changes in blood circulation patterns (Figs. 10, 11) seem to serve a stabilizing function when the thorax approaches heat stress conditions. At present, we cannot determine whether this type of mechanism is at work at the higher  $T_{th}$ 's in flight, or whether it is useful under resting conditions.

The circulation patterns described here for *M. sexta* cannot explain the simultaneous reduction of heat loss from the head at high  $T_a$ , and the increase in abdominal heat loss at high  $T_a$  during flight. A more complicated circulatory pattern may be involved. It is of interest that the sphingid, *Pholus achemon*, exudes a drop of liquid from its proboscis when overheated (Adams & Heath, 1964). If such a mechanism occurs in sphingids during flight at high  $T_a$ , evaporative cooling could keep head temperature low and at the same time provide an additional mechanism for dissipating heat transferred away from the thorax, as in honeybees (Heinrich, 1980a). However, we did not observe regurgitated fluid, either in moths flying at high  $T_a$ , or in moths which were externally heated. Therefore, an evaluation of the role of an active mechanism of evaporation in flying sphinx moths must await the acquisition of further data.

Supported by NSF grant PCM-8011158 and by the New Jersey State Experiment Station (Project no. 08511).

REFERENCES

- ADAMS, P. A. & HEATH, J. E. (1964). An evaporative cooling mechanism in *Pholus achemon* (Sphingidae). *J. Res. Lepid.* 3, 69-72.
- BAKKEN, G. S. (1976). A heat transfer analysis of animals: unifying concepts and the application of metabolism chamber data to field ecology. *J. theor. Biol.* 60, 337-384.
- BARTHOLOMEW, G. A. & EPTING, R. J. (1975). Allometry of post-flight cooling in moths: a comparison with vertebrate homeotherms. *J. exp. Biol.* 63, 603-613.
- BARTHOLOMEW, G. A. & HEINRICH, B. (1973). A field study of flight temperatures in moths in relation to body weight and wing loading. *J. exp. Biol.* 58, 123-135.
- BARTHOLOMEW, G. A., VLECK, D. & VLECK, C. M. (1981). Instantaneous measurements of oxygen consumption during pre-flight warm-up and post-flight cooling in sphingid and saturniid moths. *J. exp. Biol.* 90, 17-32.
- CASEY, T. M. (1976a). Flight energetics of sphinx moths: power input during hovering flight. *J. exp. Biol.* 64, 529-543.
- CASEY, T. M. (1976b). Flight energetics in sphinx moths: heat production and heat loss in *Hyles lineata* during free flight. *J. exp. Biol.* 64, 545-560.
- CASEY, T. M. (1980). Flight energetics and heat exchange of gypsy moths in relation to air temperature. *J. exp. Biol.* 88, 133-145.
- CASEY, T. M., HEGEL, J. R. & BUSER, C. S. (1981). Physiology and energetics of pre-flight warm-up in the Eastern tent caterpillar moth, *Malacosoma americanum*. *J. exp. Biol.* 94, 119-135.
- HEINRICH, B. (1970). Thoracic temperature stabilization by blood circulation in a free-flying moth. *Science, N.Y.* 186, 580-582.
- HEINRICH, B. (1971a). Temperature regulation of the sphinx moth, *Manduca sexta*. I. Flight energetics and body temperature during free and tethered flight. *J. exp. Biol.* 54, 141-152.
- HEINRICH, B. (1971b). Temperature regulation of the sphinx moth, *Manduca sexta*. II. Regulation of heat loss by control of blood circulation. *J. exp. Biol.* 54, 153-166.
- HEINRICH, B. (1974). Thermoregulation of endothermic insects. *Science, N.Y.* 185, 747-756.
- HEINRICH, B. (1975). Thermoregulation in bumblebees. II. Energetics of warm-up and free flight. *J. comp. Physiol.* 96, 155-166.
- HEINRICH, B. (1976). Heat exchange in relation to blood flow between thorax and abdomen in bumblebees. *J. exp. Biol.* 64, 561-585.
- HEINRICH, B. (1980a). Mechanisms of body-temperature regulation in honeybees, *Apis mellifera*. I. Regulation of head temperature. *J. exp. Biol.* 85, 61-72.
- HEINRICH, B. (1980b). Mechanisms of body-temperature regulation in honeybees, *Apis mellifera*. II. Regulation of thoracic temperature at high air temperatures. *J. exp. Biol.* 85, 73-87.
- HEINRICH, B. & BARTHOLOMEW, G. A. (1971). An analysis of pre-flight warm-up in the sphinx moth, *Manduca sexta*. *J. exp. Biol.* 55, 223-239.
- HEINRICH, B. & CASEY, T. M. (1973). Metabolic rates and endothermy in sphinx moths. *J. comp. Physiol.* 82, 195-206.
- HEINRICH, B. & CASEY, T. M. (1978). Heat transfer in dragonflies 'fliers' and 'perchers'. *J. exp. Biol.* 74, 17-36.
- KAMMER, A. E. (1968). Motor patterns during flight and warm-up in *Lepidoptera*. *J. exp. Biol.* 48, 89-109.
- MAY, M. L. (1976). Warming rate as a function of body size in periodic endotherms. *J. comp. Physiol.* 111, 55-70.
- WEIS FOGH, T. (1967). Respiration and tracheal ventilation in locusts and other flying insects. *J. exp. Biol.* 47, 561-587.
